1 Title

2 Tissue culture as a source of replicates in non-model plants: variation in cold  
3 tolerance in *Arabidopsis lyrata* ssp. *petraea*

4 Authors and Affiliations

5 Tanaka Kenta <sup>\*,1</sup>, Jessica E. M. Edwards <sup>\*,2</sup>, Roger K. Butlin <sup>\*</sup>, Terry Burke <sup>\*</sup>, W. Paul  
6 Quick <sup>\*</sup>, Peter Urwin <sup>†</sup> and Matthew P. Davey <sup>\*,3</sup>

7

8 <sup>\*</sup> Department of Animal & Plant Sciences, University of Sheffield, Sheffield, S10  
9 2TN, UK

10 <sup>†</sup> Centre for Plant Sciences, Institute of Integrative and Comparative Biology,  
11 University of Leeds, Leeds, LS2 9JT, UK

12 <sup>1</sup> Current address: Sugadaira Montane Research Center, University of Tsukuba, Ueda,  
13 386-2204, Japan

14 <sup>2</sup> Current address: Anston Greenlands Primary School, Sheffield, S25 4HD, UK

15 <sup>3</sup> Current address: Department of Plant Sciences, Downing Street, University of  
16 Cambridge, Cambridge, CB2 3EA, UK

17

18

19   Running title

20   Tissue culture and variation

21

22   Key words

23   Reaction norm, Stress tolerance, Genetic architecture, Genetic basis, Adaptive

24   variation

25

26   Corresponding author

27   Tanaka Kenta; Address: Sugadaira Montane Research Center, University of Tsukuba,

28   Sugadaira 1278-294, Ueda, 386-2204, Japan; TEL: +81- 268-74-2002; E-mail:

29   kenta@sugadaira.tsukuba.ac.jp

30

31

## 32 Abstract

33 Whilst genotype–environment interaction is increasingly receiving attention by  
 34 ecologists and evolutionary biologists, such studies need genetically homogeneous  
 35 replicates—a challenging hurdle in outcrossing plants. This could potentially be  
 36 overcome by using tissue culture techniques. However, plants regenerated from tissue  
 37 culture may show aberrant phenotypes and “somaclonal” variation. Here we examined  
 38 the somaclonal variation due to tissue culturing using the response of the  
 39 photosynthetic efficiency (chlorophyll fluorescence measurements for  $F_v/F_m$ ,  $F_v'/F_m'$   
 40 and  $\Phi_{PSII}$ , representing maximum efficiency of photosynthesis for dark- and light-  
 41 adapted leaves, and the actual electron transport operating efficiency, respectively) to  
 42 cold treatment, compared to variation among half-sibling seedlings from three  
 43 different families of *Arabidopsis lyrata* ssp. *petraea*. Somaclonal variation was  
 44 limited and we could successfully detect within-family variation in change in  
 45 chlorophyll fluorescence by cold shock with the help of tissue-culture derived  
 46 replicates. Icelandic and Norwegian families exhibited higher chlorophyll  
 47 fluorescence, suggesting higher cold tolerance, than a Swedish family. Although the  
 48 main effect of tissue culture on  $F_v/F_m$ ,  $F_v'/F_m'$  and  $\Phi_{PSII}$  was small, there were  
 49 significant interactions between tissue culture and family, suggesting that the effect of  
 50 tissue culture is genotype-specific. Tissue-cultured plantlets were less affected by cold  
 51 treatment than seedlings, but to a different extent in each family. These interactive  
 52 effects, however, were comparable to, or much smaller than the single effect of family.  
 53 These results suggest that tissue culture is a useful method for obtaining genetically  
 54 homogenous replicates for studying genotype–environment interaction related to  
 55 adaptively relevant phenotypes, such as cold tolerance, in non-model outcrossing  
 56 plants.

## 57 Introduction

58 Genotype–environment interaction on a phenotype or reaction norm may modulate  
59 natural selection (Wright 1931; Sultan 1987). The genetic basis of genotype–  
60 environment interaction is increasingly receiving attention (El-Soda *et al.* 2014; Yap  
61 *et al.* 2011); however, such advances have been concentrated in inbreeding organisms  
62 such as *Arabidopsis thaliana* (e.g. Bloomer *et al.* 2014; El-Soda *et al.* 2014; Sasaki *et*  
63 *al.* 2015; Stratton 1998) and *Caenorhabditis elegans* (Gutteling *et al.* 2007), because  
64 genetically isogenic individuals permit a given genotype to be exactly repeated in  
65 multiple environments. Recently, the wild relatives of model organisms are  
66 increasingly being exploited by evolutionary biologists to understand adaptation and  
67 speciation (Clauss & Koch 2006; Mitchell-Olds 2001). However, one disadvantage of  
68 non-model plants with outcrossing mating systems is that they cannot usually be  
69 exploited to produce the genetically homogeneous or inbred recombinant lines that  
70 enable researchers to study the reaction norms of a single genotype in multiple  
71 environments (Dorn *et al.* 2000) or to map novel QTLs in previously-genotyped lines  
72 (Alonso-Blanco *et al.* 2005). This disadvantage could be compensated for by using  
73 cutting techniques to produce multiple clones from single genotypes (Sultan & Bazzaz  
74 1993; Waitt & Levin 1993; Wu 1998). This method is only applicable to plants  
75 capable of vegetative propagation, and it also needs relatively large plant bodies to  
76 produce many replicate clones. Another technique applicable to a wider range of  
77 plants with relatively small starting plant material is tissue culture (George &  
78 Sherrington 1984). However, tissue culture has been exploited rarely for studies on  
79 the genetic basis of genotype–environment interaction, and the few existing studies  
80 (Glock 1989; Glock & Gregorius 1986) focused only on callus characteristics as  
81 target phenotypes. One potential issue that should be carefully considered is that

82 tissue-culture derived microshoots can express phenotypic, “somaclonal” variation  
 83 (Larkin & Scowcroft 1981) or may sometimes show aberrant morphology and  
 84 physiology *in vitro* (Joyce *et al.* 2003). This somaclonal variation resembles that  
 85 induced by physical mutagens, with elevated levels of chromosome breakage and  
 86 rearrangement, polyploidy, aneuploidy, transposon activation and point mutation (D’  
 87 Amato & Bayliss 1985). Therefore, with a view to exploiting the techniques of tissue  
 88 culturing more widely in studies of genotype–environment interaction in outcrossing  
 89 plants, it is necessary to extend our knowledge on how propagation by tissue culture  
 90 generates variation in phenotypes that are relevant to adaptation in natural  
 91 environments, compared to other sources of genetically-related replicates such as  
 92 outbred siblings.

93

94 Key plant properties that have attracted marked attention in the field of adaptation to  
 95 various environments are stress tolerances (e.g. Hong & Vierling 2000; Kwon *et al.*  
 96 2007; Lexer *et al.* 2003; Quesada *et al.* 2002; Steponkus *et al.* 1998; Zhang *et al.*  
 97 2004; Zhen & Ungerer 2008). One trait that can be used to indicate tolerance against  
 98 various physical stressors in plants is photosynthetic performance. Photosystem II  
 99 (PSII) activity is sensitive to both biotic and physical environmental factors (Murchie  
 100 & Lawson 2013). Chlorophyll fluorescence can be used to determine the maximum  
 101 efficiency with which light absorbed by pigments of photosystem II (PSII) is used to  
 102 drive photochemistry in dark- ( $F_v/F_m$ ) or light- ( $F_v'/F_m'$ ) adapted material and the  
 103 operating efficiency of PSII ( $\Phi_{PSII}$ ). It is a reliable indicator of photoinhibition and  
 104 damage to the photosynthetic electron transport system (Maxwell & Johnson 2000;  
 105 Quick & Stitt 1989). Changes in chlorophyll fluorescence have been successfully  
 106 used in *Arabidopsis thaliana* to quantify tolerance to cold and freezing temperatures

107 (Ehlert & Hinch 2008; Heo *et al.* 2014; Mishra *et al.* 2014), drought (Bresson *et al.*  
108 2015; McAusland *et al.* 2013; Woo *et al.* 2008), and salt and heavy-metal stress  
109 (Yuan *et al.* 2013), as well as in various other plants for tolerance to cold and freezing  
110 temperatures (Baldi *et al.* 2011; Khanal *et al.* 2015; Medeiros *et al.* 2012; Xie *et al.*  
111 2015), drought (Jansen *et al.* 2009) and salt (Yuan *et al.* 2013). If variation in  
112 chlorophyll fluorescence can be properly estimated using tissue-culture derived clones,  
113 therefore, it would enhance studies in genotype–environment interaction for stress  
114 tolerance in outcrossing plants.

115  
116 To this end, we have studied change in chlorophyll fluorescence following cold shock  
117 in a wild relative of a model plant species. *Arabidopsis lyrata* ssp. *petraea* is a close  
118 relative of the model species *A. thaliana*, but with a different ecology, life history and  
119 population genetics (Charlesworth *et al.* 2003; Davey *et al.* 2008; Davey *et al.* 2009;  
120 Kuittinen *et al.* 2008; Kunin *et al.* 2009). Whilst *A. thaliana* is mainly selfing, with a  
121 low level of genetic diversity within a population, *A. lyrata* ssp. *petraea* is outcrossing,  
122 with a high level of genetic diversity even within a population (Clauss & Mitchell-  
123 Olds 2006; Heide *et al.* 2006; Kunin *et al.* 2009; Schierup *et al.* 2008). Further  
124 studies on genetic and phenotypic variation in spatially distinct individuals and in  
125 closely-related plants will clarify whether or not locally advantageous alleles are fixed  
126 and if local populations are in evolutionary equilibrium, and are thus important in our  
127 understanding of the evolutionary responses to environmental change. Distinguishing  
128 phenotypic variation among closely related individuals from measurement errors is  
129 difficult; however, this becomes possible if we can quantify the error within the same  
130 genotype using tissue-cultured clones.

131

132 In this study, we measured the chlorophyll fluorescence parameters  $F_v/F_m$ ,  $F_v'/F_m'$  and  
 133  $\Phi_{PSII}$  before and after cold shock, as an index of cold tolerance, for seedlings from  
 134 three families from geographically isolated populations of *A. lyrata* ssp. *petraea*, and  
 135 tissue cultured plantlets derived from several genotypes (seeds) in each of those  
 136 families (Table 1). In order to evaluate the usefulness of tissue culture for obtaining  
 137 genetically homogenous replicates and to assess how much adaptively-relevant  
 138 variation exists within the species, we tested whether (i) among-genotype phenotypic  
 139 variation could be detected with the help of replication of tissue cultured plantlets, (ii)  
 140 somaclonal variation would remain in the range of other components of variation such  
 141 as within-family variation of seedlings, (iii) phenotypic variation in adaptively  
 142 relevant traits would exist between families and (iv) tissue-culturing affected these  
 143 measurements of chlorophyll fluorescence.

## 144 Material and Methods

### 145 *Plants*

146

147 Seeds of *Arabidopsis l. petraea* were collected from geographically separated  
 148 populations in Ardal (Norway) (61°19'25"N, 7°50'00"E, alt. 63 m), Notsand  
 149 (Sweden) (62°36'31"N, 18°03'37"E, alt. 3 m) and Sandfell (Iceland) (64°04'14"N,  
 150 21°41'06"E, alt. 123 m). No specific permits were required for the seed collection for  
 151 this study because these locations were not privately owned or protected in any way  
 152 and because the species was not protected in these countries. The species is a  
 153 perennial herb and keeps leaves throughout the year. We used a family of seeds that  
 154 were at least half-siblings, from one mother plant in each population. We grew 28–40

155 seedlings per family and in each case derived 44–69 tissue-cultured plantlets from 2–3  
156 seeds (1 genotype = cloned plantlets from one seed) of each family.

157

# 158 *Tissue culture*

159

160 Seeds were sterilised in 10% commercial bleach for 20 min, washed in sterile water  
161 and stored at 4°C overnight. The seeds were then placed onto 50% strength Murashige  
162 and Skoog (MS) medium (Melford Laboratories Ltd, Ipswich, UK), pH 5.7,  
163 supplemented with 1 % sucrose, 5 mg/L silver thiosulphate and solidified with 1 %  
164 plant agar (Melford Labs. Ltd). The agar plates were held vertically, allowing for  
165 maximum recovery of root tissue. After 4 weeks the root systems were excised and  
166 placed intact onto Callus Induction Medium (CIM) (Clarke *et al.*, 1992) solidified  
167 with 0.55% plant agar. Plates were incubated at 23 °C for 3 days then the roots were  
168 cut into 5 mm lengths and placed in bundles on fresh CIM plates that were further  
169 incubated at 20°C for 2–3 days. The root sections from each plant were resuspended  
170 in 10 ml molten Shoot Overlay Medium (SOM) (Clarke *et al.*, 1992) solidified with  
171 0.8 % low gelling-temperature agarose and poured over a single 90 mm plate of Shoot  
172 Induction Medium (SIM) (Clarke *et al.*, 1992) solidified with 0.55 % plant agar and  
173 lacking antibiotics. The plates were incubated at 20 °C under a 16-hour day length.  
174 Once shoots started to form from the calli they were transferred to 50 % strength MS  
175 medium, pH5.7, supplemented with 1 % sucrose and solidified with 0.55% plant agar,  
176 such that each plate contained 9 clones of the same genotype. A total of 4–9 plantlets  
177 survived per plate. Each plate was treated as a block in the following experiment.

178

# 179 *Seedling growth*

180

181 Seeds were sown in Levington M3 compost within individual plug trays. Families  
182 were randomised within each tray and trays were randomly repositioned every other  
183 day. Plants were watered from the base of the pot as required with reverse-osmosis  
184 (RO) purified water. No additional nutrients were added to the soil or water. Plants  
185 were established to 6–8 leaf stage in controlled-environment growth cabinets  
186 (Convion Controlled Environments Limited, Canada) set to a 12/12 hour day/night  
187 cycle, 20/15 °C day/night, 70 % humidity; atmospheric CO<sub>2</sub> concentration was 400  
188 ppm and photosynthetically-active radiation 250 μmol m<sup>-2</sup> s<sup>-1</sup>. Chlorophyll  
189 fluorescence measurements were taken just prior to and after a 24 hour cold treatment  
190 in which plants were exposed to the same conditions as above, apart from the  
191 temperature being decreased to 3 °C. 5–8 seedlings from the same family were treated  
192 as a block in the following experiment.

193

#### 194 *Chlorophyll fluorescence*

195

196 Pre-cold and post-cold treatment measurements of chlorophyll fluorescence were  
197 obtained using a chlorophyll fluorescence imager using Fluorimager software  
198 (Technologica Ltd., Colchester, UK). Each block of plants was dark adapted for at  
199 least 15 minutes before the maximum efficiency of photosystem II ( $F_v/F_m$ ) was  
200 measured to a blue light pulse at 3000 μmol m<sup>-2</sup> s<sup>-1</sup> for 200 ms. Following this pulse,  
201 the plants were exposed to an actinic light of 150 μmol m<sup>-2</sup> s<sup>-1</sup> for six minutes,  
202 followed by pulses of 3000 μmol m<sup>-2</sup> s<sup>-1</sup> for 200 ms to obtain measures of maximum  
203 efficiency of photosystem II ( $F_v'/F_m'$ ) of light-adapted plant material and the  
204 operating efficiency of photosystem II ( $\Phi_{PSII}$ ) in light-adapted plant material. Mean

205 values of  $F_v/F_m$ ,  $F_v'/F_m'$  and  $\Phi_{PSII}$  for each plant were taken from the image of each  
206 whole plant.

207 All these phenotypic data are available in Dryad Digital Repository:

208 <http://dx.doi.org/10.5061/dryad.xxxxx>.

209

# 210 *Statistical analyses*

211

212 To examine the relative importance of among-family and among-genotype variation  
213 in cold tolerance, we used nested ANOVA to partition the total variance in the  
214 difference in each chlorophyll fluorescence measurement ( $F_v/F_m$ ,  $F_v'/F_m'$  or  $\Phi_{PSII}$ )  
215 induced by cold shock:

216

$$217 \quad VD \sim VF / VG / VB$$

218

219 where VD was the total variance in difference in each type of chlorophyll  
220 fluorescence for a plant individual between two measurements (i.e. value after cold  
221 shock minus that before cold shock), VF was the component of among-family  
222 variance, VG was the component of among-genotype variance nested in VF and VB  
223 was the component of among-block variance nested in VG. We did this analysis  
224 separately for the tissue-cultured plants and seedlings, in order to evaluate variation in  
225 each natural and tissue-cultured condition. The VG term was not applied to the  
226 analysis for seedlings. We also conducted variance component analysis using the  
227 varcomp function in the ape library and the lme function using R 2.8.0(R  
228 Development Core Team 2008).

229

230 We tested whether variance in the change of  $F_v/F_m$ ,  $F_v'/F_m'$  or  $\Phi_{PSII}$  due to cold  
 231 shock among tissue-culture derived plantlets within each genotype was different from  
 232 that in seedlings of half-siblings of the same family using Bartlett tests. Because the  
 233 number of blocks differed between seedlings and tissue-cultured plantlets (Table 1),  
 234 we checked first whether the difference in the number of blocks affected the variance,  
 235 by re-sampling all possible combinations of 4 blocks from the 10 blocks of half-  
 236 siblings in Ardal and Notsand. Reducing block number changed the original variance  
 237 for 10 blocks only  $< \pm 3\%$  without systematic bias.

238

239 Finally, we evaluated the effect of several factors on each type of chlorophyll  
 240 fluorescence measurement before and after cold treatment. We constructed the  
 241 following linear mixed-effect model, in which plant individual was treated as a  
 242 random effect:

243

$$244 \quad CF = I|B/P + C + T + F + C \times T + T \times F + C \times F + C \times T \times F$$

245

246 where CF was a single measurement of either  $F_v/F_m$ ,  $F_v'/F_m'$  or  $\Phi_{PSII}$  and I|B/P was  
 247 the intercept with random effects of block, and individual plant nested in each block,  
 248 C was a binary variable of cold shock (1 for shocked and 0 for not), T was a binary  
 249 variable of tissue culture (1 for tissue cultured and 0 for not) and F was a categorical  
 250 variable of family (3 families), followed by the interaction terms among those  
 251 variables. The effect of each term was estimated by the lme function using the  
 252 statistical software R 2.8.0 (R Development Core Team 2008). Akaike's Information  
 253 Criterion (AIC) was compared between the full model and a model lacking each term

254 in a stepwise manner and the best model with the lowest AIC was selected, followed  
255 by testing the significance of each selected parameter using the Wald test.

## 256 Results

### 257 *Variance components in cold-response of $F_v/F_m$ , $F_v'/F_m'$ and $\Phi_{PSII}$*

258

259 In the seedlings, the changes in  $F_v/F_m$ ,  $F_v'/F_m'$  or  $\Phi_{PSII}$  by cold treatment varied  
260 significantly among families, explaining 4.9–9.1 % of the total variance (Table 2). For  
261 the tissue-cultured plantlets, the change in those indices by cold treatment did not vary  
262 significantly among families, but did vary significantly among genotypes within  
263 family, this component explaining 8.5–31.5 % of the total variance. The within-block  
264 variance component for tissue-cultured plantlets was 61.7–81.8 % and tended to be  
265 smaller than this component for seedlings (89.1–92.2 %).

266

### 267 *Evaluation of somaclonal variation in comparison to within-family variation*

268

269 Variances in the change of  $F_v/F_m$ ,  $F_v'/F_m'$  or  $\Phi_{PSII}$  among clones within genotype  
270 were clearly smaller than those among half-siblings of the same family in the Sandfell  
271 family. Most genotypes had significantly smaller variances in  $F_v/F_m$ ,  $F_v'/F_m'$  and  $\Phi_{PSII}$   
272 than half-sibs as shown by the Bartlett test (Fig. 1). Similar patterns were observed in  
273 Notsand and Ardal. No studied genotype had larger variance among clones than the  
274 variance among half-siblings in any family.

275

### 276 *Effects of cold shock, tissue culturing and family on $F_v/F_m$ , $F_v'/F_m'$ and $\Phi_{PSII}$*

277

278 All single effects of cold shock, tissue culture and family and all possible interaction  
 279 combinations among them affected  $F_v/F_m$  and  $F_v'/F_m'$ , and all such effects except the  
 280 3-way interaction between cold shock, tissue culture and family affected  $\Phi_{PSII}$ ,  
 281 according to the best model (Table 3) based on Akaike's Information Criterion (AIC).  
 282 Cold shock and family were the strongest single effects. The interaction between these  
 283 two factors was also found to change all three measurements of chlorophyll  
 284 fluorescence, indicating that the effect of cold shock depended on family. The effect  
 285 of tissue culture was relatively small and not significant for any of the chlorophyll  
 286 fluorescence measures. We found substantial interactions between tissue culture and  
 287 family and interactions among cold shock, tissue culture and family, indicating that  
 288 the effect of tissue culture depended on family.

289

## 290 Discussion

291

### 292 *Among-genotype variance*

293

294 We were able to test for among-genotype variance using replicates generated by tissue  
 295 culture within genotypes and we detected such variance in  $F_v/F_m$ ,  $F_v'/F_m'$  and  $\Phi_{PSII}$   
 296 measurements (Table 2). On the other hand, we showed significant but low  
 297 somaclonal variation. The within-block variance component for tissue-cultured  
 298 plantlets was relatively small (Table 2). The Bartlett tests showed that somaclonal  
 299 variation was smaller than, or at least remained within the range of, the within-family  
 300 variance, which is the smallest naturally observed component of variation in the  
 301 hierarchy of genetic structure (Fig. 1). In *A. thaliana*, studies of natural variation have  
 302 focused mainly on between-population variation (e.g. (Shindo *et al.* 2007). In contrast,

303 *A. lyrata* has substantial within-population variation, for example in the composition  
 304 of glucosinolates (Clauss *et al.* 2006) or self-incompatibility genes (Schierup *et al.*  
 305 2008). In this paper, we showed that there is within-family as well as among-family,  
 306 and thus among-population, genetic variation in *A. lyrata* ssp. *petraea*. Within-family  
 307 genetic variance was relatively large in Sandfell (Iceland). The observed within-  
 308 family genetic variances in adaptively relevant traits highlight the wide potential for  
 309 evolutionary adaptation of the species and further validates the usefulness of relatives  
 310 of model organisms in evolutionary biology (Clauss & Koch 2006; Mitchell-Olds  
 311 2001).

312

### 313 *Among-family variance*

314

315 There was significant or marginally significant among-family variance in the change  
 316 of  $F_v/F_m$ ,  $F_v'/F_m'$  and  $\Phi_{PSII}$  values by cold treatment for seedlings (Table 2). In *A.*  
 317 *thaliana*, the change in chlorophyll fluorescence from before to after cold shock  
 318 correlates with tolerance to sub-zero temperatures measured by electrolyte leakage or  
 319 survival and, therefore, this is regarded as an indicator of cold tolerance (Ehlert &  
 320 Hinch 2008; Heo *et al.* 2014; Khanal *et al.* 2015). Therefore, our result also  
 321 represents evidence for among-family (thus possibly among-population) variance in  
 322 cold tolerance. Linear mixed models (Table 3) showed that  $F_v'/F_m'$  after cold-shock  
 323 was higher in family Ardal and Sandfell, and  $F_v/F_m$  and  $\Phi_{PSII}$  after cold-shock was  
 324 higher in family Sandfell, compared to Notsand (Sweden). These results are consistent  
 325 with families Aradal (Norway) and Sundfell (Iceland) being derived from relatively  
 326 high latitude and high altitude and so having high cold tolerance. This among-family  
 327 effect was weaker for tissue-cultured plantlets (Table 3). This may be due to the small

number of genotypes for each family in our nested experimental design, or, could be explained by the main part of the among-family variance detected for seedlings being due to among-genotype variance within families.

### *Effects of tissue culturing*

We detected genotype-specific effects of tissue culture on  $F_v/F_m$ ,  $F_v'/F_m'$  and  $\Phi_{PSII}$  (Table 3). This is consistent with a previous report of a genotype-specific effect on callus characteristics (Glock 1989; Glock & Gregorius 1986). The three measured parameters of chlorophyll fluorescence ( $F_v/F_m$ ,  $F_v'/F_m'$  and  $\Phi_{PSII}$ ) all decreased after the cold treatment (Table 3), indicating a decrease in photosystem II activity, as reported in previous studies (Finazzi *et al.* 2006). A positive effect of interaction between tissue culture and cold shock for  $\Phi_{PSII}$  suggests that tissue-cultured plants were less affected by cold shock than seedlings, and an interaction between tissue culture, cold shock and family suggests that the extent to which tissue-cultured plants were less affected by cold shock differed among families. Any differences among families in traits related to responses to the tissue-culture environment, including root-cutting, callus formation and growth on medium, might explain these observed interactions between tissue culture and family. This finding is consistent with the report that somaclonal variation is genotype-dependent and influenced by both the explant source and the tissue-culture protocol (George & Sherrington 1984), and a recent study that found that the effect of tissue culture on somatic mutations depended on genotype (Zhang *et al.* 2010). The effects of tissue culture–genotype interaction, however, were comparable to, or much smaller than the single effect of family (Table 3), indicating that such interactions would not mask the single effect of genotype. The

353 interaction between tissue culture and family was much smaller in  $\Phi_{PSII}$  (the range  
354 between maximum and minimum estimates was  $0.043 - (-0.005) = 0.048$ , Table 2)  
355 than in  $F_v/F_m$  ( $0.082 - 0 = 0.082$ ) and  $F_v'/F_m'$  ( $0.181 - 0 = 0.181$ ). The interaction  
356 between cold shock, tissue culture and family was detected only in  $F_v/F_m$  and  $F_v'/F_m'$ .  
357 Also, the relative impact of among-genotype variance was smaller for  $\Phi_{PSII}$  (8.5% of  
358 the total variance, Table 2) than  $F_v/F_m$  (31.5 %) and  $F_v'/F_m'$  (10.9 %). These results  
359 imply that, although the maximum efficiencies of photosynthesis for dark- ( $F_v/F_m$ )  
360 and light-adapted leaves ( $F_v'/F_m'$ ) were affected by tissue culturing in genotype-  
361 specific ways, the actual electron transport operating efficiency ( $\Phi_{PSII}$ ) was less  
362 affected by tissue culture.

363

#### 364 *Conclusion*

365 Overall, we successfully detected among-genotype variance, with low somaclonal  
366 variation, indicating that the advantage of tissue culturing in generating genetically  
367 isogenic replicates exceeded its disadvantage in amplifying somaclonal variation in  
368 our study system. We detected interaction effects of tissue culture with genotype for  
369 an adaptively relevant trait, cold tolerance; however, such variation would not mask  
370 the single effect of genotype. Therefore, although one should carefully consider  
371 effects of tissue culturing when interpreting any results relying on the technique,  
372 tissue culturing is a useful method for obtaining genetically homogenous replicates in  
373 this, and probably other non-model organisms. It can provide critical additional  
374 power when studying phenotypes such as cold tolerance related to adaptation in  
375 natural environments, the variation in the phenotypes among families or populations,  
376 the reaction norms of a genotype or the QTLs accounting for phenotypes.

377

## 378 Acknowledgements

379 We are grateful to Prof. M. Burrell for advice, Dr. P. Vergeer for providing seeds and  
380 Dr. C. Lilley and Ms. J. Hibbard for providing tissue culture protocols. This research  
381 was funded by the Natural Environment Research Council Post-Genomics and  
382 Proteomics programme (NE/C507837/1) in UK; the Special Coordination Funds for  
383 Promoting Science and Technology from the Ministry of Education, Culture, Sports,  
384 Science and Technology of the Japanese Government (MEXT); and research  
385 exchange program between Japan and UK by Japan Society for the Promotion of  
386 Science (10037611-000065).

## 387 References

- 388 Alonso-Blanco C, Gomez-Mena C, Llorente F, *et al.* (2005) Genetic and molecular  
389 analyses of natural variation indicate *CBF2* as a candidate gene for underlying  
390 a freezing tolerance quantitative trait locus in *Arabidopsis*. *Plant Physiology*  
391 **139**, 1304-1312.
- 392 Baldi P, Pedron L, Hietala AM, La Porta N (2011) Cold tolerance in cypress  
393 (*Cupressus sempervirens* L.): a physiological and molecular study. *Tree*  
394 *genetics & genomes* **7**, 79-90.
- 395 Bloomer RH, Lloyd AM, Symonds VV (2014) The genetic architecture of constitutive  
396 and induced trichome density in two new recombinant inbred line populations  
397 of *Arabidopsis thaliana*: phenotypic plasticity, epistasis, and bidirectional leaf  
398 damage response. *BMC Plant Biology* **14**.
- 399 Bresson J, Vasseur F, Dauzat M, *et al.* (2015) Quantifying spatial heterogeneity of  
400 chlorophyll fluorescence during plant growth and in response to water stress.  
401 *Plant Methods* **11**.
- 402 Charlesworth D, Mable BK, Schierup MH, Bartolome C, Awadalla P (2003) Diversity  
403 and linkage of genes in the self-incompatibility gene family in *Arabidopsis*  
404 *lyrata*. *Genetics* **164**, 1519-1535.
- 405 Clauss MJ, Dietel S, Schubert G, Mitchell-Olds T (2006) Glucosinolate and trichome  
406 defenses in a natural *Arabidopsis lyrata* population. *Journal of Chemical*  
407 *Ecology* **32**, 2351-2373.
- 408 Clauss MJ, Koch MA (2006) Poorly known relatives of *Arabidopsis thaliana*. *Trends*  
409 *in Plant Science* **11**, 449-459.
- 410 Clauss MJ, Mitchell-Olds T (2006) Population genetic structure of *Arabidopsis lyrata*  
411 in Europe. *Molecular Ecology* **15**, 2753-2766.
- 412 D' Amato F, Bayliss MW (1985) Cytogenetics of plant cell and tissue cultures and  
413 their regenerates. *Critical Reviews in Plant Sciences* **3**, 73-112.

- 414 Davey MP, Burrell MM, Woodward FI, Quick WP (2008) Population-specific  
415 metabolic phenotypes of *Arabidopsis lyrata* ssp *petraea*. *New Phytologist* **177**,  
416 380-388.
- 417 Davey MP, Woodward FI, Quick WP (2009) Intraspecific variation in cold-  
418 temperature metabolic phenotypes of *Arabidopsis lyrata* ssp. *petraea*.  
419 *Metabolomics* **5**, 138-149.
- 420 Dorn LA, Pyle EH, Schmitt J (2000) Plasticity to light cues and resources in  
421 *Arabidopsis thaliana*: Testing for adaptive value and costs. *Evolution* **54**,  
422 1982-1994.
- 423 Ehler B, Hinch DK (2008) Chlorophyll fluorescence imaging accurately quantifies  
424 freezing damage and cold acclimation responses in *Arabidopsis* leaves. *Plant*  
425 *Methods* **4**, 12.
- 426 El-Soda M, Malosetti M, Zwaan BJ, Koornneef M, Aarts MGM (2014) Genotype x  
427 environment interaction QTL mapping in plants: lessons from *Arabidopsis*.  
428 *Trends in Plant Science* **19**, 390-398.
- 429 Finazzi G, Johnson GN, Dall'Osto L, *et al.* (2006) Nonphotochemical quenching of  
430 chlorophyll fluorescence in *Chlamydomonas reinhardtii*. *Biochemistry* **45**,  
431 1490-1498.
- 432 George EF, Sherrington PD (1984) *Plant propagation by tissue culture* Exegetics Ltd.,  
433 Basingstoke.
- 434 Glock H (1989) Environmental effects on growth of tissue cultures of a woody  
435 *Solanum* species (*Solanum laciniatum*). *Plant Science* **62**, 137-143.
- 436 Glock H, Gregorius HR (1986) Genotype–environment interaction in tissue cultures  
437 of birch. *Theoretical and Applied Genetics* **72**, 477-482.
- 438 Gutteling EW, Riksen JAG, Bakker J, Kammenga JE (2007) Mapping phenotypic  
439 plasticity and genotype-environment interactions affecting life-history traits in  
440 *Caenorhabditis elegans*. *Heredity* **98**, 28-37.
- 441 Heidel AJ, Clauss MJ, Kroymann J, Savolainen O, Mitchell-Olds T (2006) Natural  
442 variation in *MAM* within and between populations of *Arabidopsis lyrata*  
443 determines glucosinolate phenotype. *Genetics* **173**, 1629-1636.
- 444 Heo J-Y, Feng D, Niu X, *et al.* (2014) Identification of quantitative trait loci and a  
445 candidate locus for freezing tolerance in controlled and outdoor environments  
446 in the overwintering crucifer *Boechera stricta*. *Plant Cell and Environment* **37**,  
447 2459-2469.
- 448 Hong S-W, Vierling E (2000) Mutants of *Arabidopsis thaliana* defective in the  
449 acquisition of tolerance to high temperature stress. *Proceedings of the*  
450 *National Academy of Sciences of the United States of America* **97**, 4392-4397.
- 451 Jansen M, Gilmer F, Biskup B, *et al.* (2009) Simultaneous phenotyping of leaf growth  
452 and chlorophyll fluorescence via GROWSCREEN FLUORO allows detection  
453 of stress tolerance in *Arabidopsis thaliana* and other rosette plants. *Functional*  
454 *Plant Biology* **36**, 902-914.
- 455 Joyce SM, Cassells AC, Jain SM (2003) Stress and aberrant phenotypes in in vitro  
456 culture. *Plant Cell Tissue and Organ Culture* **74**, 103-121.
- 457 Khanal N, Moffatt BA, Gray GR (2015) Acquisition of freezing tolerance in  
458 *Arabidopsis* and two contrasting ecotypes of the extremophile *Eutrema*  
459 *salsugineum* (*Thellungiella salsuginea*). *Journal of Plant Physiology* **180**, 35-  
460 44.
- 461 Kuittinen H, Niittyvuopio A, Rinne P, Savolainen O (2008) Natural variation in  
462 *Arabidopsis lyrata* vernalization requirement conferred by a *FRIGIDA* indel  
463 polymorphism. *Molecular Biology and Evolution* **25**, 319-329.

- 464 Kunin WE, Vergeer P, Kenta T, *et al.* (2009) Variation at range margins across  
465 multiple spatial scales: environmental temperature, population genetics and  
466 metabolomic phenotype. *Proceedings of the Royal Society B-Biological*  
467 *Sciences* **276**, 1495-1506.
- 468 Kwon Y, Kim SH, Jung MS, *et al.* (2007) *Arabidopsis hot2* encodes an endochitinase-  
469 like protein that is essential for tolerance to heat, salt and drought stresses.  
470 *Plant Journal* **49**, 184-193.
- 471 Larkin PJ, Scowcroft WR (1981) Somaclonal variation—a novel source of variability  
472 from cell cultures for plant improvement. *Theoretical and Applied Genetics* **60**,  
473 197-214.
- 474 Lexer C, Welch ME, Durphy JL, Rieseberg LH (2003) Natural selection for salt  
475 tolerance quantitative trait loci (QTLs) in wild sunflower hybrids: Implications  
476 for the origin of *Helianthus paradoxus*, a diploid hybrid species. *Molecular*  
477 *Ecology* **12**, 1225-1235.
- 478 Maxwell K, Johnson GN (2000) Chlorophyll fluorescence - a practical guide. *Journal*  
479 *of Experimental Botany* **51**, 659-668.
- 480 McAusland L, Davey PA, Kanwal N, Baker NR, Lawson T (2013) A novel system for  
481 spatial and temporal imaging of intrinsic plant water use efficiency. *Journal of*  
482 *Experimental Botany* **64**, 4993-5007.
- 483 Medeiros JS, Marshall DL, Maherali H, Pockman WT (2012) Variation in seedling  
484 freezing response is associated with climate in *Larrea*. *Oecologia* **169**, 73-84.
- 485 Mishra A, Heyer AG, Mishra KB (2014) Chlorophyll fluorescence emission can  
486 screen cold tolerance of cold acclimated *Arabidopsis thaliana* accessions.  
487 *Plant Methods* **10**.
- 488 Mitchell-Olds T (2001) *Arabidopsis thaliana* and its wild relatives: a model system  
489 for ecology and evolution. *Trends in Ecology & Evolution* **16**, 693-700.
- 490 Murchie EH, Lawson T (2013) Chlorophyll fluorescence analysis: a guide to good  
491 practice and understanding some new applications. *Journal of Experimental*  
492 *Botany* **64**, 3983-3998.
- 493 Quesada V, Garcia-Martinez S, Piqueras P, Ponce MR, Micol JL (2002) Genetic  
494 architecture of NaCl tolerance in *Arabidopsis*. *Plant Physiology* **130**, 951-963.
- 495 Quick WP, Stitt M (1989) An examination of factors contributing to non-  
496 photochemical quenching of chlorophyll fluorescence in barley leaves.  
497 *Biochimica et Biophysica Acta* **977**, 287-296.
- 498 R Development Core Team (2008) *R: A language and environment for statistical*  
499 *computing* R Foundation for Statistical Computing., Vienna, Austria.  
500 <http://www.R-project.org>.
- 501 Sasaki E, Zhang P, Atwell S, Meng D, Nordborg M (2015) "Missing" G x E variation  
502 controls flowering time in *Arabidopsis thaliana*. *Plos Genetics* **11**, e1005597.
- 503 Schierup MH, Bechsgaard JS, Christiansen FB (2008) Selection at work in self-  
504 incompatible *Arabidopsis lyrata*. II. Spatial distribution of S haplotypes in  
505 Iceland. *Genetics* **180**, 1051-1059.
- 506 Shindo C, Bernasconi G, Hardtke CS (2007) Natural genetic variation in *Arabidopsis*:  
507 tools, traits and prospects for evolutionary ecology *Annals Of Botany* **99**,  
508 1043-1054.
- 509 Steponkus PL, Uemura M, Joseph RA, Gilmour SJ, Thomashow MF (1998) Mode of  
510 action of the COR15a gene on the freezing tolerance of *Arabidopsis thaliana*.  
511 *Proceedings of the National Academy of Sciences of the United States of*  
512 *America* **95**, 14570-14575.

513 Stratton DA (1998) Reaction norm functions and QTL-environment interactions for  
514 flowering time in *Arabidopsis thaliana*. *Heredity* **81**, 144-155.  
515 Sultan S, Bazzaz F (1993) Phenotypic plasticity in *Polygonum persicaria*. I. Diversity  
516 and uniformity in genotypic norms of reaction to light. *Evolution*, 1009-1031.  
517 Waitt D, Levin D (1993) Phenotypic integration and plastic correlations in *Phlox*  
518 *drummondii* (Polemoniaceae). *American Journal of Botany*, 1224-1233.  
519 Woo NS, Badger MR, Pogson BJ (2008) A rapid, non-invasive procedure for  
520 quantitative assessment of drought survival using chlorophyll fluorescence.  
521 *Plant Methods* **4**.  
522 Wu RL (1998) The detection of plasticity genes in heterogeneous environments.  
523 *Evolution* **52**, 967-977.  
524 Xie HJ, Li H, Liu D, *et al.* (2015) *ICE1* demethylation drives the range expansion of a  
525 plant invader through cold tolerance divergence. *Molecular Ecology* **24**, 835-  
526 850.  
527 Yap JS, Li Y, Das K, Li J, Wu R (2011) Functional mapping of reaction norms to  
528 multiple environmental signals through nonparametric covariance estimation.  
529 *BMC Plant Biology* **11**.  
530 Yuan F, Chen M, Leng BY, Wang BS (2013) An efficient autofluorescence method  
531 for screening *Limonium bicolor* mutants for abnormal salt gland density and  
532 salt secretion. *South African Journal of Botany* **88**, 110-117.  
533 Zhang JZ, Creelman RA, Zhu JK (2004) From laboratory to field. Using information  
534 from *Arabidopsis* to engineer salt, cold, and drought tolerance in crops. *Plant*  
535 *Physiology* **135**, 615-621.  
536 Zhang MS, Wang H, Dong ZY, *et al.* (2010) Tissue culture-induced variation at  
537 simple sequence repeats in sorghum (*Sorghum bicolor* L.) is genotype-  
538 dependent and associated with down-regulated expression of a mismatch  
539 repair gene, MLH3. *Plant Cell Reports* **29**, 51-59.  
540 Zhen Y, Ungerer MC (2008) Clinal variation in freezing tolerance among natural  
541 accessions of *Arabidopsis thaliana*. *New Phytologist* **177**, 419-427.  
542  
543

544

Figure

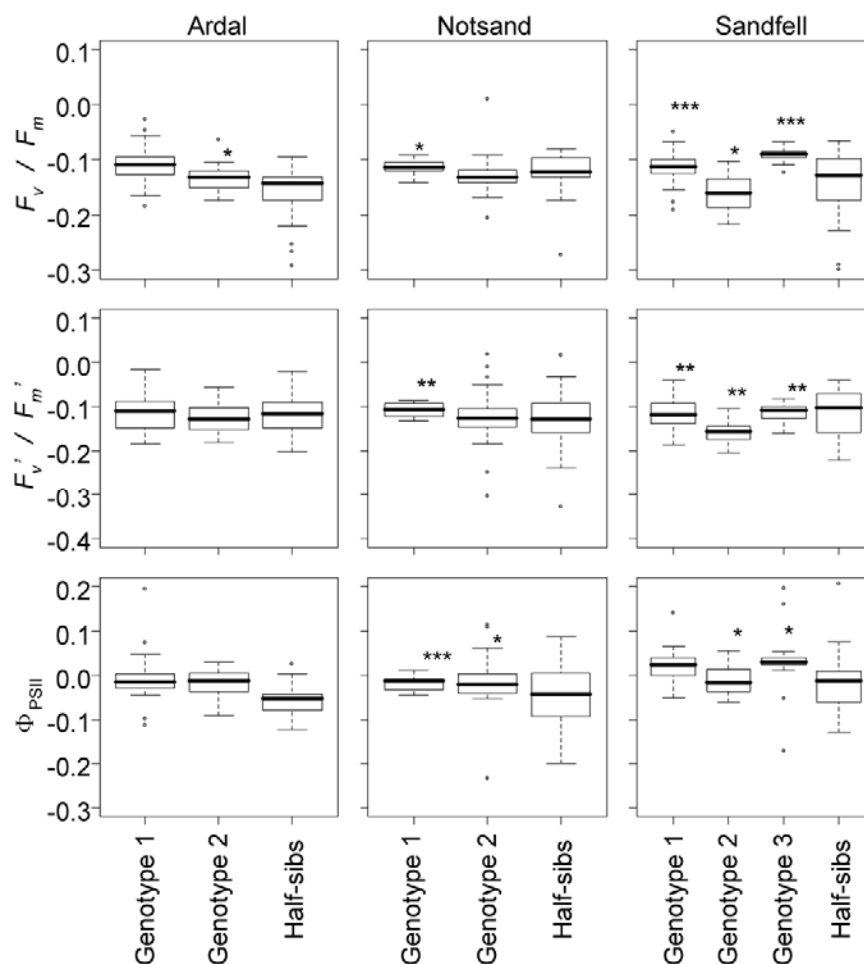

546

547 Figure. 1. Change in chlorophyll fluorescence ( $F_v/F_m$ ,  $F_v'/F_m'$  and  $\Phi_{PSII}$ ) in seedlings  
548 or plantlets originating from Norway (Ardal), Sweden (Notsand) and Iceland  
549 (Sandfell) after cold-treatment (*values after shock – those before shock*). \*, \*\* and  
550 \*\*\* =  $P < 0.05$ ,  $P < 0.01$  and  $P < 0.001$ , respectively, (Bartlett test) indicate a  
551 significantly lower variance of the genotype than among half-siblings in the same  
552 family. Three  $F_v/F_m$  values (0.340, 0.375, 0.592) and an  $F_v'/F_m'$  value (0.354) in

553 Sandfell half-siblings were out of the vertical ranges shown but were included in the  
554 statistical tests.  
555

## 556 Tables

557 Table 1. Numbers of plants and blocks in each family (Ardal, Notsand and Sandfell).

558 Plants were either seedlings in a half-sibling family or tissue-cultured clonal plantlets

559 from genotypes derived from a seed from each family.

|                            | Genotype 1 | Genotype 2 | Genotype 3 | Half sibs |
|----------------------------|------------|------------|------------|-----------|
| Ardal                      |            |            |            |           |
| Number of plants           | 33         | 36         | -          | 40        |
| Number of blocks           | 4          | 4          | -          | 10        |
| Plants / block (min - max) | 6 - 9      | 9 - 9      | -          | 4 - 4     |
| Notsand                    |            |            |            |           |
| Number of plants           | 13         | 31         | -          | 40        |
| Number of blocks           | 2          | 4          | -          | 10        |
| Plants / block (min - max) | 5 - 8      | 4 - 9      | -          | 4 - 4     |
| Sandfell                   |            |            |            |           |
| Number of plants           | 45         | 28         | 23         | 28        |
| Number of blocks           | 5          | 4          | 3          | 4         |
| Plants / block (min - max) | 9 - 9      | 5 - 9      | 5 - 9      | 5 - 8     |

560

561

Table 2. Analysis of variance for change in  $F_v/F_m$ ,  $F_v'/F_m'$  and  $\Phi_{PSII}$  by cold treatment for non-tissue cultured seedlings and tissue-cultured plantlets. Family and Block refer to variation among families and among blocks within families, respectively

|                                             | Seedlings |        |         |      |       |                        | Tissue cultures |        |         |       |       |                        |
|---------------------------------------------|-----------|--------|---------|------|-------|------------------------|-----------------|--------|---------|-------|-------|------------------------|
|                                             | Df        | Sum Sq | Mean Sq | F    | P     | Variance component (%) | Df              | Sum Sq | Mean Sq | F     | P     | Variance component (%) |
| <b><i>F<sub>v</sub>/F<sub>m</sub></i></b>   |           |        |         |      |       |                        |                 |        |         |       |       |                        |
| Family                                      | 2         | 0.027  | 0.013   | 2.84 | 0.081 | 4.9                    | 2               | 0.002  | 0.001   | 0.06  | 0.946 | 0.0                    |
| Genotype                                    |           |        |         |      |       |                        | 4               | 0.080  | 0.020   | 11.52 | 0.000 | 31.5                   |
| Block                                       | 21        | 0.098  | 0.005   | 1.11 | 0.351 | 6.1                    | 19              | 0.033  | 0.002   | 1.91  | 0.016 | 6.8                    |
| Within Block                                | 84        | 0.353  | 0.004   |      |       | 89.1                   | 183             | 0.167  | 0.001   |       |       | 61.7                   |
| <b><i>F<sub>v</sub>'/F<sub>m</sub>'</i></b> |           |        |         |      |       |                        |                 |        |         |       |       |                        |
|                                             |           |        |         | 10.0 |       |                        |                 |        |         |       |       |                        |
| Family                                      | 2         | 0.081  | 0.041   | 1    | 0.001 | 7.8                    |                 | 0.005  | 0.002   | 0.24  | 0.798 | 0.0                    |
| Genotype                                    |           |        |         |      |       |                        | 4               | 0.041  | 0.010   | 3.27  | 0.034 | 10.9                   |
| Block                                       | 21        | 0.085  | 0.004   | 0.33 | 0.997 | 0.0                    | 19              | 0.059  | 0.003   | 2.54  | 0.001 | 14.1                   |
| Within Block                                | 84        | 1.048  | 0.012   |      |       | 92.2                   | 183             | 0.225  | 0.001   |       |       | 74.9                   |
| <b><i>Φ<sub>PSII</sub></i></b>              |           |        |         |      |       |                        |                 |        |         |       |       |                        |
| Family                                      | 2         | 0.026  | 0.013   | 8.44 | 0.002 | 9.1                    | 2               | 0.044  | 0.022   | 2.81  | 0.173 | 7.7                    |
| Genotype                                    |           |        |         |      |       |                        | 4               | 0.031  | 0.008   | 3.37  | 0.030 | 8.5                    |
| Block                                       | 21        | 0.032  | 0.002   | 0.45 | 0.978 | 0.0                    | 19              | 0.044  | 0.002   | 1.23  | 0.241 | 2.0                    |
| Within Block                                | 84        | 0.282  | 0.003   |      |       | 90.9                   | 183             | 0.349  | 0.002   |       |       | 81.8                   |

Table 3. The best linear mixed models for  $F_v/F_m$ ,  $F_v'/F_m'$  and  $\Phi_{PSII}$ , based on AIC.  
Intercepts represent the mixture of background conditions, i.e. not cold shocked, not tissue cultured, and family Notsand. Fam A and Fam S refer to families Ardal and Sandfell, respectively.

|                                      | Estimates | SE    | DF  | <i>t</i> | <i>P</i> |
|--------------------------------------|-----------|-------|-----|----------|----------|
| <i>F<sub>v</sub>/F<sub>m</sub></i>   |           |       |     |          |          |
| Intercept                            | 0.787     | 0.011 | 311 | 71.3     | <0.001   |
| Cold shock                           | -0.122    | 0.008 | 311 | -15.9    | <0.001   |
| Tissue culture                       | -0.017    | 0.015 | 302 | -1.1     | 0.252    |
| Fam A                                | -0.026    | 0.015 | 302 | -1.7     | 0.093    |
| Fam S                                | -0.091    | 0.017 | 302 | -5.4     | <0.001   |
| Cold shock x Tissue culture          | -0.007    | 0.011 | 311 | -0.7     | 0.506    |
| Cold shock x Fam A                   | -0.035    | 0.011 | 311 | -3.2     | 0.002    |
| Cold shock x Fam S                   | -0.007    | 0.012 | 311 | -0.5     | 0.584    |
| Tissue culture x Fam A               | 0.029     | 0.020 | 302 | 1.5      | 0.147    |
| Tissue culture x Fam S               | 0.082     | 0.021 | 302 | 3.9      | <0.001   |
| Cold shock x Tissue culture x Fam A  | 0.043     | 0.014 | 311 | 3.0      | 0.003    |
| Cold shock x Tissue culture x Fam S  | 0.015     | 0.015 | 311 | 1.0      | 0.327    |
| <i>F<sub>v</sub>'/F<sub>m</sub>'</i> |           |       |     |          |          |
| Intercept                            | 0.695     | 0.014 | 311 | 50.9     | <0.001   |
| Cold shock                           | -0.131    | 0.011 | 311 | -12.1    | <0.001   |
| Tissue culture                       | -0.019    | 0.019 | 302 | -1.0     | 0.304    |
| Fam A                                | -0.050    | 0.019 | 302 | -2.6     | 0.009    |
| Fam S                                | -0.167    | 0.021 | 302 | -7.9     | <0.001   |
| Cold shock x Tissue culture          | 0.011     | 0.015 | 311 | 0.8      | 0.446    |
| Cold shock x Fam A                   | 0.015     | 0.015 | 311 | 0.9      | 0.345    |
| Cold shock x Fam S                   | 0.068     | 0.017 | 311 | 4.0      | <0.001   |
| Tissue culture x Fam A               | 0.070     | 0.025 | 302 | 2.8      | 0.006    |
| Tissue culture x Fam S               | 0.181     | 0.026 | 302 | 6.9      | <0.001   |
| Cold shock x Tissue culture x Fam A  | -0.013    | 0.020 | 311 | -0.7     | 0.514    |
| Cold shock x Tissue culture x Fam S  | -0.077    | 0.021 | 311 | -3.7     | <0.001   |
| $\Phi_{PSII}$                        |           |       |     |          |          |
| Intercept                            | 0.403     | 0.012 | 313 | 34.2     | <0.001   |
| Cold shock                           | -0.047    | 0.006 | 313 | -7.7     | <0.001   |
| Tissue culture                       | -0.027    | 0.016 | 302 | -1.7     | 0.090    |
| Fam A                                | -0.029    | 0.016 | 302 | -1.8     | 0.081    |
| Fam S                                | -0.086    | 0.018 | 302 | -4.7     | <0.001   |
| Cold shock x Tissue culture          | 0.034     | 0.006 | 313 | 5.8      | <0.001   |
| Cold shock x Fam A                   | -0.004    | 0.007 | 313 | -0.5     | 0.610    |
| Cold shock x Fam S                   | 0.028     | 0.007 | 313 | 3.9      | <0.001   |
| Tissue culture x Fam A               | -0.005    | 0.021 | 302 | -0.2     | 0.822    |
| Tissue culture x Fam S               | 0.043     | 0.022 | 302 | 2.0      | 0.051    |

573
